# Supplementary material for: Synthesis and Characterization of Co-Ru@NC- MOF, Co-Ru@ ZSM-5 and Co-Ru@ ɤ- Al 2 O 3 , Composite Catalysts – An Applications in Fischer-Tropsch Synthesis
Source: Research Square preprint supplement (doi:10.21203/rs.3.rs-2506486/v1), 2023-02-01
Supplement: Supplementary file 1 [file 5dac55f7ace51140f0e482be.docx]

**Table 1.** The results of EDX and atomic absorption tests

| Catalyst |  |  |  | EDX |  |  |  | atomic absorption |
| --- | --- | --- | --- | --- | --- | --- | --- | --- |
|  | **Co K** | **Ru L** | **C K** | **N K** | **O K** | **Al K** | **Si k** | **Co** |
| ZIF-67 | 18 | - | 41.89 | 40.1 | - | - | - | 17.63 |
| Co-Ru@NC | 75.63 | 1.85 | 12.74 | 9.78 | - | - | - | 74.04 |
| Co-Ru@ZSM-5 | 15.05 | 0.44 | 11.05 | - | 36.75 | 4.45 | 32.24 | 14.76 |
| Co-Ru@ɤ-Al2O3 | 21.53 | 0.71 | - | - | 30.09 | 47.83 |  | 20.35 |

**Table 2**. Textural properties of the ZIF-67 and catalysts.

| Catalyst | BET surface  area (m2/g) | Pore Volume  (cm3/g) | Pore diameter  (nm) |
| --- | --- | --- | --- |
| ZIF-67 | 1487.1 | 0.69 | 1.87 |
| Co-Ru@NC | 254.40 | 0.26 | 4.10 |
| Co-Ru@ | 219.12 | 0.42 | 7.70 |
| Co-Ru@ZSM-5 | 220.01 | 0.13 | 2.39 |

**Table 3**. crystal size of cobalt oxide, metallic cobalt and dispersion of metallic cobalt of the synthesized catalysts

|  | Average Crystallite size of cobalt oxide (nm) | Average Crystallite size of metallic cobalt (nm) | Dispersion of metallic cobalt (%D) |
| --- | --- | --- | --- |
| ZIF-67 | 44.3727 | 33.2795 | 2.8846 |
| Co-Ru@NC | 7.5459 | 5.6594 | 16.9627 |
| Co-Ru@ZSM-5 | 10.7771 | 8.078 | 11.83931 |
| Co-Ru | 11.654 | 8.7405 | 10.9833 |

**Table 4.** Hydrogen consumption of catalysts measured by H2-TPR

| Total  mmol H2/g | H2 consumption, mmol H2/g | Peak II( T/C°) | H2 consumption, mmol H2/g | Peak I( T/C°) | Catalyst |
| --- | --- | --- | --- | --- | --- |
| 2.82 | 2.05 | 283.8 | 0.77 | 185.5 | ZSM-5@ Co-Ru |
| 3.22 | 2.36 | 443.1 | 0.86 | 229 | Co-Ru |
| 7.62 | 3.44 | 483.1 | 4.18 | 243.9 | Co-Ru@NC |

**Table 5.** Detailed FTS performance of the Co-Ru@NC, Co-Ru/ZSM-5 and Co-Ru/ɤ-Al2O3 catalyst

| Catalysts | T(°C) | CO  Conversion (%) |  |  | Selectivity (%) |  | α value | Yield (%) |
| --- | --- | --- | --- | --- | --- | --- | --- | --- |
|  |  |  | CO2 | CH4 | C2-4 | C5+ |  |  |
| Co-Ru@NC | 210  220  230 | 65.10  72.29  85.62 | 0.010  0.029  0.046 | 4.89  6.25  8.37 | 1.25  1.86  2.16 | 93.85  91.88  89.45 | 0.91  0.9  0.88 | 61.09  66.42  76.59 |
| Co-Ru/ZSM-5 | 210  220  230 | 55.24  64.58  78.35 | 1.08  1.37  1.76 | 12.74  20.05  25.80 | 6.97  7.27  9.50 | 80.27  72.67  64.69 | 0.88  0.87  0.85 | 44.34  46.93  50.68 |
| Co-Ru/ɤ-Al2O3 | 210  220  230 | 49.12  60.48  72.48 | 1.54  1.76  2.29 | 15.6  20.72  28.98 | 3.90  5.71  6.11 | 80.50  73.56  64.90 | 0.87  0.85  0.83 | 39.50  44.49  47.20 |
